RESEARCH ARTICLE

# Increased Specific Labeling of INS-1 Pancreatic Beta-Cell by Using RIP-Driven Cre Mutants with Reduced Activity

Gen-cheng Gong<sup>1</sup>, Wen-zhu Fan<sup>1</sup>, Di-zheng Li<sup>1</sup>, Xiong Tian<sup>1</sup>, Shao-jun Chen<sup>1</sup>, Yu-cai Fu<sup>2</sup>, Wen-can Xu<sup>3</sup>, Chi-ju Wei<sup>1\*</sup>

**1** Multidisciplinary Research Center, Shantou University, Shantou, Guangdong, 515063, China,

**2** Laboratory of Cell Senescence, Shantou University Medical College, Shantou, Guangdong, 515041, China, **3** Department of Endocrinology, the First Affiliated Hospital of Shantou University Medical College,

Shantou, Guangdong, 515041, China

\* [chijuwei@stu.edu.cn](mailto:chijuwei@stu.edu.cn)

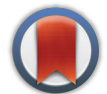

CrossMark  
click for updates

## OPEN ACCESS

**Citation:** Gong G-c, Fan W-z, Li D-z, Tian X, Chen S-j, Fu Y-c, et al. (2015) Increased Specific Labeling of INS-1 Pancreatic Beta-Cell by Using RIP-Driven Cre Mutants with Reduced Activity. PLoS ONE 10(6): e0129092. doi:10.1371/journal.pone.0129092

**Academic Editor:** Tao Cai, NIDCR/NIH, UNITED STATES

**Received:** March 2, 2015

**Accepted:** May 6, 2015

**Published:** June 5, 2015

**Copyright:** © 2015 Gong et al. This is an open access article distributed under the terms of the [Creative Commons Attribution License](http://creativecommons.org/licenses/by/4.0/), which permits unrestricted use, distribution, and reproduction in any medium, provided the original author and source are credited.

**Data Availability Statement:** All relevant data are within the paper.

**Funding:** This research was supported by the Li Ka Shing Foundation, the Natural Science Foundation of China (<http://www.nsf.gov.cn/>) (Grant Nos. 30971665, 81172894, 81370925), and the Education Department of Guangdong (<http://www.gdhd.edu.cn/>) (Grant No. cxzd1123). The funders had no role in study design, data collection and analysis, decision to publish, or preparation of the manuscript.

**Competing Interests:** The authors have declared that no competing interests exist.

## Abstract

Ectopically expressed Cre recombinase in extrapancreatic tissues in RIP-Cre mice has been well documented. The objective of this study was to find a simple solution that allows for improved beta-cell specific targeting. To this end, the RIP-Cre and reporter CMV-loxP-DsRed-loxP-EGFP expression cassettes were configured into a one-plasmid and two-plasmid systems, which labeled approximately 80% insulin-positive INS-1 cells after 48 h transfection. However, off-target labeling was robustly found in more than 15% insulin-negative Ad293 cells. When an IRES element was inserted in front of Cre to reduce the translation efficiency, the ratio of recombination between INS-1 and Ad293 cells increased 3-4-fold. Further, a series of Cre mutants were generated by site-directed mutagenesis. When one of the mutants, Cre(H289P) in both configurations, was used in the experiment, the percentage of recombination dropped to background levels in a number of insulin-negative cell lines, but decreased only slightly in INS-1 cells. Consistently, DNA substrate digestion assay showed that the enzymatic activity of Cre(H289P) was reduced by 30-fold as compared to that of wild-type. In this study, we reported the generation of constructs containing RIP and Cre mutants, which enabled enhanced beta-cell specific labeling *in vitro*. These tools could be invaluable for beta-cell targeting and to the study of islet development.

## Introduction

Over the past decade, the adoption of the Cre/loxP system for genetic manipulation has impinged profoundly on the study of pancreatic islet development and beta-cell function [1–3]. Various promoters including that of the pancreas duodenal homeobox 1 (Pdx1) [4,5], neurogenin 3 (Ngn3) [6] and insulin (Ins1 and Ins2) [7,8] genes have been used to confine the expression of Cre recombinase within the pancreas populations, and among these, the rat Ins2 promoter (RIP) was the most commonly chosen regulatory sequence for generating the

transgenic model [1]. Results from these mice demonstrate that *pdx1*-expressing precursors give rise to all pancreatic lineages [4], and that different types of endocrine cells in the islets of Langerhans are derived from *ngn3*-expressing progenitors [6]. In order to trace the fate of post mitotic islet beta-cells *in vitro*, Russ *et al.* produced two lentiviral vectors, one contains the RIP-Cre cassette, the other encompasses the reporter CMV-loxP-DsRed-loxP-EGFP construct [9]. Their findings provide direct evidences that terminally differentiated human islet beta-cells are capable of dedifferentiation and proliferation.

However, numerous studies have demonstrated that many widely used Cre mice are not as tissue-specific as previously intended [10–12]. For example, the supposedly pancreas-specific transgenic Cre drivers show ectopic expression, although mainly in the brain, raising concern of whether the resultant phenotype, when cross to the reporter line, can be completely attributed to alterations in the pancreas [13,14]. This is consistent with the reports that insulin expression can be detected, albeit at low levels, in the brain and other extra-pancreatic organs under physiological and pathological conditions [15,16]. Further, toxicity and glucose intolerance have been found in RIP-Cre mice in the absence of genes targeted by loxP sites [17,18]. In line with this, a genome-wide survey has identified a myriad of cryptic loxP sites in mammalian cells that can promote unintended DNA recombination and damage [19].

In this study, we proposed a simple solution to improve beta-cell specific targeting by using Cre mutants with reduced enzymatic activity. The RIP-Cre cassette and the floxed reporter were configured into a one-plasmid or two-plasmid system. Transient transfection into insulin-positive and-negative cells allowed easy and sensitive detection of non-specific targeting.

## Materials and Methods

### Plasmid construction

All plasmids were generated from pEGFP-N1, pDsRed-Express-1, pd2EYFP-N1, pIRES2 of Clontech (Mountain View, CA), pRIP-CreER [20] of Addgene (Cambridge, MA), pUC18 of Life Technologies (Rockville, MD), and p210 [21] containing an intron-bearing Cre recombinase (generous gift from Dr. J.E. Green) using standard cloning techniques as described below, and verified by sequencing by Jinsirui (Nanjing, China). A schematic diagram of constructed plasmids was shown in Fig 1.

For all PCR reactions except site-directed mutagenesis, the following conditions were used: 200–500 pg of DNA template, 1 mM MgSO<sub>4</sub>, 0.3 mM dNTPs, 0.3 μM primers, and 1.25 U of Pfu-polymerase (Life Technologies, Rockville, MD) in a total reaction volume of 50 μl. Thermocycle parameters were: 98°C for 2 min, followed by 98°C for 10 s, 60–65°C for 5 s and 72°C for 1 kb/min for a total of 35 cycles. Sequences of primer sets were listed in Table 1.

### Generation of the two-plasmid system

**Construction of pRIP-Cre.** The intron-bearing Cre recombinase was cut with KpnI/NotI from p210 [21], and used to replaced the CreER fragment (KpnI/NotI) of pRIP-CreER [20].

**Construction of pCMV-loxP/DsRed/loxP-EGFP.** A DNA fragment containing two loxP sites in tandem repeat and an EcoRV site in between was synthesized by Yingjun (Shanghai, China). Also, the fragment was designed to contain two sticky 3'-ends compatible with HindIII and SacII sites, respectively. After phosphorylation at 5'-ends, the fragment was ligated into pUC18 at HindIII/SacII sites. The DsRed fragment containing a polyadenylation site was cut with AgeI/AflIII from pDsRed-Express-1, blunt-ended and ligated to pUC-loxP/loxP at EcoRV. The loxP-DsRed-loxP fragment was then cut with HindIII/BamHI, and ligated to pEGFP-N1 at HindIII/BamHI, finishing the reporter construct pCMV-loxP-DsRed-loxP-EGFP.

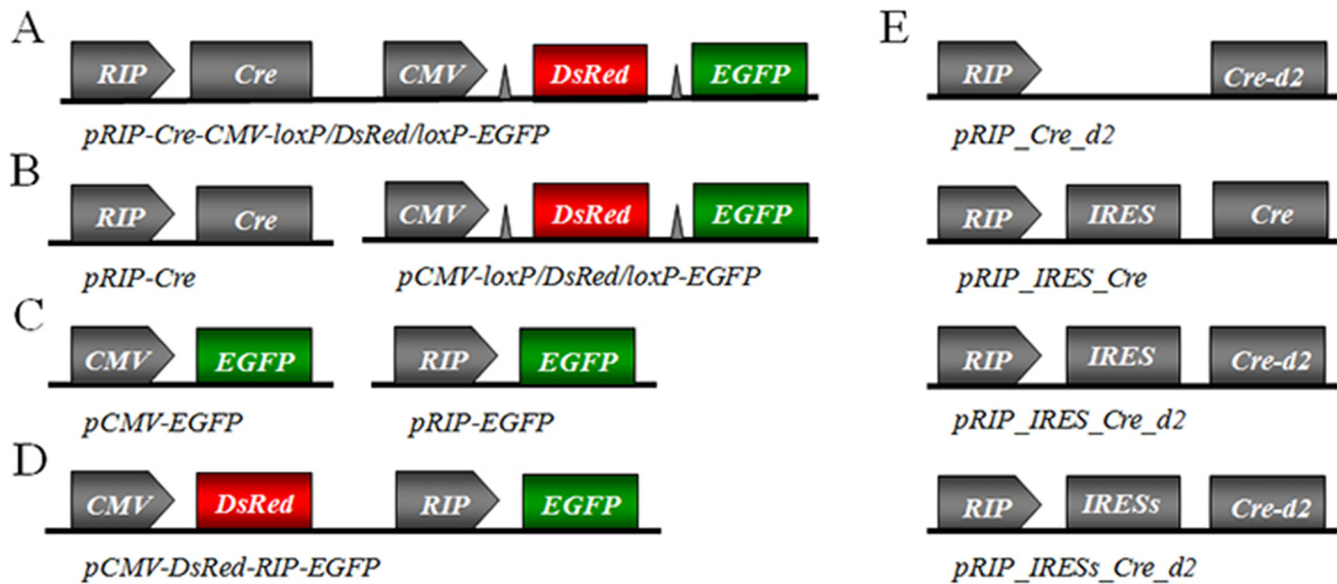

**Fig 1. Schematic diagram of plasmids constructed in this study.** (A) One plasmid system. (B) Two plasmid system. In these designs, when Cre recombinase is expressed, DsRed will be deleted, while EGFP will be activated. (C) Plasmids for testing RIP specificity. (D) Plasmid for testing promoter interference. If promoter interference exists, insulin-negative cells should turn green; otherwise they are red-only. (E) Plasmids with reduced Cre expression levels. The d2 sequence promotes accelerated degradation of Cre fusion protein; while the insertion of IRES reduces the translation efficiency of Cre. The triangles in (A) and (B) represent loxP sites. Each coding sequence has a polyadenylation site in behind.

doi:10.1371/journal.pone.0129092.g001

### Generation of the one-plasmid system

**Construction of pRIP-Cre-CMV-loxP/DsRed/loxP-EGFP.** The CMV-loxP-DsRed-loxP-EGFP fragment was PCR amplified from the reporter plasmid with primers F1/R1 containing AflII at both 5'-ends, and then ligated into pRIP-Cre at AflII site.

### Generation of plasmids for promoter specificity and interference

**Construction of pRIP-EGFP.** A Kpn/NotI fragment containing the EGFP sequence was cut from pEGFP-N1, and then used to replace the CreER (Kpn/NotI) fragment from pRIP-CreER.

**Construction of pCMV-DsRed-RIP-EGFP.** The DsRed fragment containing a polyadenylation site was cut with BamHI/AflII from pDsRed-Express-1, blunt-ended and ligated to pEGFP-N1 at BamHI/AflII. The EGFP fragment (BamHI/AflII) from pEGFP-N1 was ligated to pRIP-CreER at BamHI/AflII. A BglII/AflII fragment containing the RIP-EGFP-polyA sequence was cut from pRIP-EGFP, blunt-ended, and inserted after the DsRed sequence of pCMV-DsRed at AflII site.

**Table 1. PCR primer sets used for plasmid construction.**

|   | F-primer                 | R-primer                    |
|---|--------------------------|-----------------------------|
| 1 | TATCTTAAGTGC GTTATCCCCTG | CGCTTACAATTTACGCCTTAAG      |
| 2 | CATCTGCCACCAGCCAGCTATCA  | TTAAAAGCTTATCGCCATCTTCCAGCA |
| 3 | CGATAAGCTTAGCCATGGCTT    | ACGCCTTAAGAATTCGATGAG       |
| 4 | TCTATATCTGCAGGCGCGGGT    | ATCCGCCGATAACCAGTGAAAC      |
| 5 | CGTCGTCTCCTCGCTTG        | TAGGTAGAGCGCGGCGA           |

doi:10.1371/journal.pone.0129092.t001

**Table 2. PCR primer sets used for site-directed mutagenesis.**

| Mutat. | F-primer                 | R-primer                   |
|--------|--------------------------|----------------------------|
| R173A  | GTTAGCTATAGCCGAAATTGCCAG | AGGGTGTTATAAGCAATCCCCAG    |
| R173H  | ACATATAGCCGAAATTGCCAG    | AACAGGGTGTTATAAGCAATCC     |
| R173K  | GTTAAAGATAGCCGAAATTGCCAG | AGGGTGTTATAAGCAATCCCCAG    |
| R173L  | GTTACTTATAGCCGAAATTGCCAG | AGGGTGTTATAAGCAATCCCCAG    |
| E176F  | ATAGCCTTCATTGCCAGGATCAG  | ACGTAACAGGGTGTTATAAGCAATCC |
| E176V  | ATAGCCGTAATTGCCAGGATCAG  | ACGTAACAGGGTGTTATAAGCAATCC |
| K201R  | GAACGAGGACGCTGGTTAGC     | TGCCAATATGGATTAACATTCTCC   |
| H289F  | ATTCAGTGCCCGTGTGCGGAG    | CCAGACCAGGCCAGGTATCTCT     |
| H289P  | ACCCAGTGCCCGTGTGCGGAG    | CCAGACCAGGCCAGGTATCTCTGAC  |
| H289I  | AATCAGTGCCCGTGTGCGGAG    | CCAGACCAGGCCAGGTATCTCT     |
| H289V  | AGTCAGTGCCCGTGTGCGGAGC   | CCAGACCAGGCCAGGTATCTCTGAC  |
| H289T  | AACCAGTGCCCGTGTGCGGAG    | CCAGACCAGGCCAGGTATCTCTGAC  |
| H289Y  | ATACAGTGCCCGTGTGCGGAGCC  | CCAGACCAGGCCAGGTATCTCTGAC  |
| R292A  | GCTGTCGGAGCCGCGGAGAT     | GGCACTGTGTCCAGACCAGGCCAG   |
| R292H  | CATGTCGGAGCCGCGGAGAT     | GGCACTGTGTCCAGACCAGGCCAG   |
| R292L  | CTTGTCGGAGCCGCGGAGATAT   | GGCACTGTGTCCAGACCAGGCCAG   |
| W315L  | GCTTGACCAATGTAATATTGTC   | ACCAGCTTGCATGATCTCCG       |
| W315M  | GGCATGACCAATGTAATATTGTC  | ACCAGCTTGCATGATCTCCG       |

doi:10.1371/journal.pone.0129092.t002

## Generation of plasmids with reduced Cre protein levels

**Construction of pRIP-Cre-d2.** Three pieces ligation was performed to construct pRIP-Cre-d2. The C-terminus of Cre was amplified from pRIP-Cre with primers F2/R2 containing ClaI and HindIII at 5'-ends, respectively. The PEST fragment of the murine ornithine decarboxylase (d2), which stimulates protein degradation, was amplified from pd2EYFP-N1 with primers F3/R3 containing HindIII and AflII at 5'-ends, respectively. Finally, pRIP-Cre was cut with ClaI and AflII, and ligated with the PCR amplified Cre C-terminal and d2 fragments.

**Construction of pRIP-IRES-Cre.** Three pieces ligation was performed to construct pRIP-IRES-Cre. The IRES fragment was cut with MluI and SalI from pIRES2. The Cre fragment was cut with XhoI and AflII from pRIP-Cre. The sticky ends of SalI and XhoI are compatible. Finally, pRIP-Cre was cut with MullI and AflII, and ligated with the IRES and Cre fragments.

**Construction of pRIP-IRES-Cre-d2.** Three pieces ligation was performed to construct pRIP-IRES-Cre. The IRES fragment was cut with MluI and SalI from pIRES2. The Cre-d2 fragment was cut with XhoI and AflII from pRIP-Cre-d2. Finally, pRIP-Cre-d2 was cut with MullI and AflII, and ligated with the IRES and Cre fragments.

**Construction of pRIP-IRESs-Cre-d2.** pRIP-IRES-Cre-d2 was cut with XmaI between IRES and Cre, blunt-ended and religated. A frame shift was created between IRES and Cre, and therefore further degreasing the translation efficiency.

## Site-directed mutagenesis

Site-directed mutagenesis was performed by PCR with one of the primers carrying point mutation at the 5'-end. Sequences of primer sets were listed in Table 2. Plasmid DNA was diluted with ddH<sub>2</sub>O to 400 pg/μl, and the following conditions were used for PCR according to the instruction of the company: 1 μl of DNA template, 1 μl primers mix (10 mM), 25 μl PrimeSTAR mix (Takara, Dalian, China) in a total reaction volume of 50 μl. Thermocycle parameters were:

98°C for 2 min, followed by 98°C for 10 s, 50–65°C for 5 s and 72°C for 5 min for a total of 30 cycles. Purified PCR product was phosphorylated at 5'-end and ligated for transformation into *E. coli* TOP10.

### Tissue culture

All cell lines, including INS-1 Ad293, CHO, HeLa, Pt67, SHG44, and PC12 were propagated in Dulbecco's Modified Eagle Medium (Life Technologies, Rockville, MD) supplemented with 10% fetal calf serum (FCS, HyCLONE, Logan, UT), 2 mM glutamine, 50 U/ml of penicillin G sodium and 50 µg/ml of streptomycin sulfate (Beyotime, Haimen, China). Cells were cultivated in humidified incubators containing 5% CO<sub>2</sub> at 37°C.

### Transfection of cells

DNA (up to 48 fmol) and 1 µl of polyfect reagent (Qiagen, Shanghai, China) were diluted with serum-free DMEM to 30 and 20 µl, respectively. Diluted polyfect reagent was then added into DNA, vortexed, and incubated at room temperature for 10 min. After adding 100 µl culture medium, the DNA mixture (150 µl) was put into a 96-well (Costar, Corning, NY), which had been pre-seeded with 5000 cells overnight. After 12 h transfection, the DNA mixture was removed and fresh culture medium was replenished. Transfections were performed in triplicate and experiments were repeated at least three times. Cells were visualized at 24 h and 48 h using a fluorescence microscope (Eclipse TE 2000, Nikon, Japan) equipped with a CCD camera.

### Flow cytometry analysis

Cells were harvested from 96-well plates after 24 h or 48 h transfection. Samples from three 96 wells were pooled and applied to a BD FACSAria (BD, Franklin lakes, NJ) equipped with a 70 mm nozzle. The instrument was activated with a single argon ion laser (488 nm) and compensated by running an automatic program. Dead cells and debris were excluded. A total of 10,000 events for each sample were acquired and analyzed with FlowJo 7.6.1 (FlowJoChina, Hangzhou, China).

### Measurement of Cre transcripts

The procedure has been described previously with modifications [22]. Total RNA was isolated from Ad293 and INS-1 cells transfected with pRIP-Cre or pCMV-Cre for 48 h. After reverse transcription, the cDNA was diluted with H<sub>2</sub>O (Dnase and Rnase free, Toyobo) into a volume of 100 µl, of which 5 µl was used for PCR amplification of Cre and 18S rDNA transcripts using primers F4/R4 and F5/R5, respectively.

### Immunofluorescence cell staining

The procedure has been described previously with modifications [22]. Ad293 and INS-1 cells in a 96-well plate were transfected with pRIP-Cre or pCMV-Cre for 48 h. Cells were then fixed with 4% paraformaldehyde for 15 min at room temperature, and permeabilized with 0.2% triton-X 100 for 10 min. Cells were incubated with the Goat anti-Cre antibody (1:100, Santa Cruz, California) for 2 h, and Cy3-Donkey-anti-Goat IgG (1:200, Beyotime, Haimen, China) for 1 h, and finally with DAPI (100 ng/ml, Beyotime, Haimen, China) 5 min. Three PBS washings were performed between each step. Images were taken under a fluorescence microscope equipped with a CCD camera (Nikon, Eclipse TE 2000, Japan).

## Purification of recombinant Cre recombinase

DNA (3  $\mu\text{g}$ ) and 10  $\mu\text{l}$  of polyfect reagent (Qiagen, Shanghai, China) were used to transfect cells in 6-well plates ( $4 \times 10^5$ /well, pre-seeded over night) as described above. After 48 h transfection, cells were lysed with 200  $\mu\text{l}$ /well of RIPA buffer (Beyotime, Haimen, China) supplemented with 1 mM phenylmethylsulfonyl fluoride (PMSF, Beyotime, Haimen, China). Protein immunoprecipitation was performed according to the procedure provided by the company (Thermo Scientific, Waltham, MA). The supernatant from four 6-wells was collected by centrifugation at 12,000 g for 5 min, and then applied to a chromatography column pre-filled with Goat anti-Cre antibody (Santa Cruz, Dallas, TX) conjugated resin. After washing three times with Coupling buffer, Cre protein was eluted with 100  $\mu\text{l}$  of Elution buffer. The verification and quantification of Cre protein was performed by Western blotting.

## Western blotting

Purified Cre protein and Cre standard were run in a 10% SDS PAGE gel. After electrophoresis, the proteins were electro-transferred onto a PVDF membrane (MultiSciences, Hangzhou, China), blocked in 2% bovine serum albumin (BSA) solution for 30 min, incubated with Goat anti-Cre antibody (1:1000, Santa Cruz, Dallas, TX) overnight at 4°C. After washing, the membrane was incubated with horse radish peroxidase (HRP)-conjugated Rabbit anti-Goat antibody (Zymed Laboratories, South San Francisco, CA) for 2 h, and finally being developed with ECL (Pierces, Haimen, China) solution for about 30 min. Protein band intensity was quantified by ImageJ software (NIH, Bethesda, MD).

## Measurement of Cre activity *in vitro*

Cre recombination activity *in vitro* was measured according to the procedure provided by the company (NEB, Ipswich, MA). DNA substrate (125 ng) was incubated with various amount of purified Cre protein at 37°C for 30 min, and then analyzed by electrophoresis on 2% agarose gel. DNA band intensity was quantified by ImageJ software (NIH, Bethesda, MD), and used for calculation of the percentage of DNA recombination.

## Statistical analysis

All data were presented as the mean value  $\pm$  standard deviation (SD) of each group. The student's t-test was carried out by using GraphPad Prism 5. *p* values less than 0.05 were considered statistically significant.

## Results

### Substantial non-specific labeling of Ad293 cells by the one-plasmid system

We constructed the RIP-Cre and reporter expression cassettes in a one-plasmid and two-plasmid systems (Fig 1). Cre recombinase is supposedly expressed only in insulin producing cells due to the regulation of tissue-specific rat *Ins2* promoter, which then in turn results in deletion of the floxed *DsRed* sequence and activation of EGFP. Thus if the system displays strong specificity, insulin producing cells should be green while non-insulin producing cells should be red. However, when the one-plasmid system (Fig 1A) was used in the transfection, EGFP signals not only appeared in insulin-positive INS-1 cells, but also found frequently in insulin-negative Ad293 cells (Fig 2).

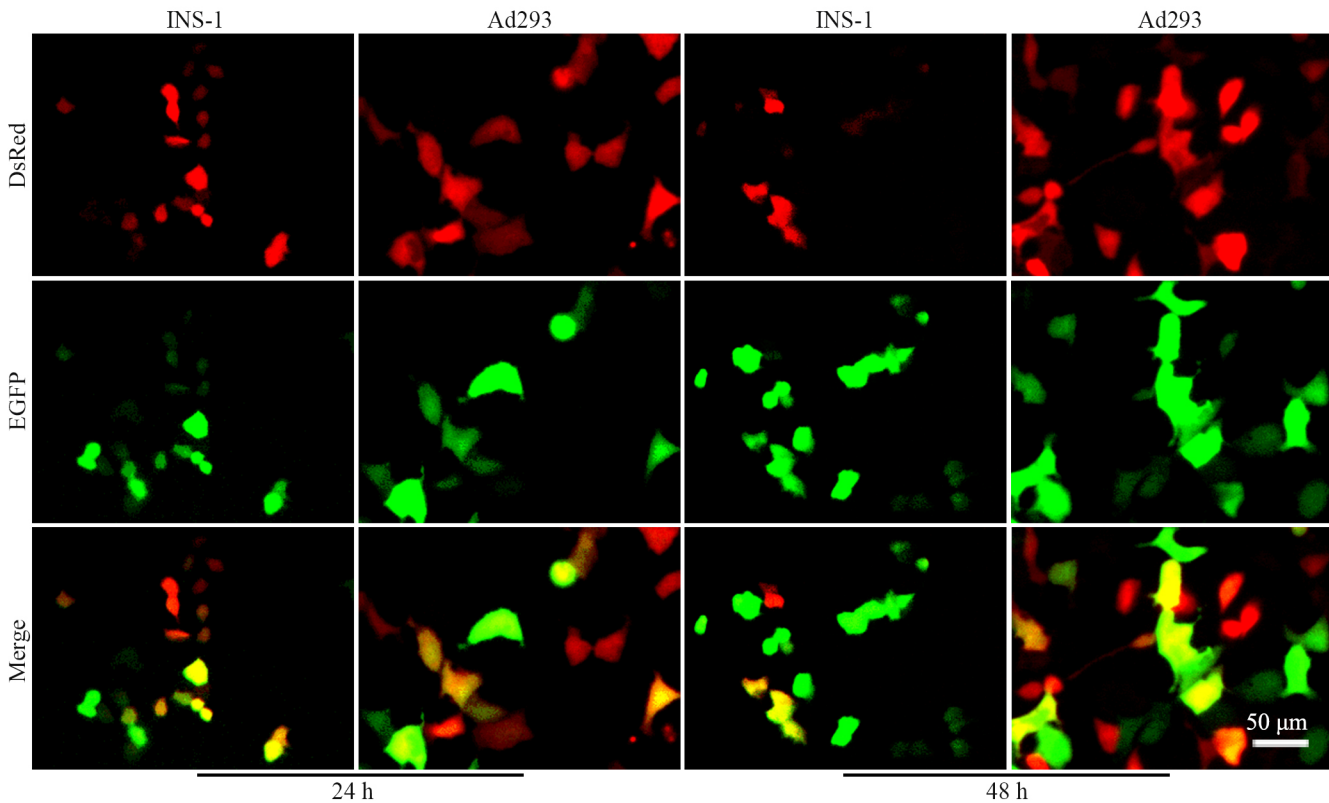

**Fig 2. Non-specific labeling of insulin-negative cells by RIP-Cre in a one-plasmid configuration.** INS-1 and Ad293 cells ( $1 \times 10^4$ /well) were seeded in a 96-well plate overnight and transfected with 32 fmol/well of DNA (Fig 1A). Cells were observed under a fluorescence microscope. Images were taken with a CCD camera. Micrographs show the expression of DsRed (upper panel), EGFP (middle panel), and Merge (lower panel) in INS-1 and Ad293 cells after 24 and 48 h transfection.

doi:10.1371/journal.pone.0129092.g002

Quantitative analysis by FACS showed that the percentage of EGFP+ Ad293 cells increased from about 10% after 24 h transfection to approximately 20% at 48 h (Fig 3A). On the other hand, EGFP+ INS-1 cells reached almost 40% and 80%, respectively, after 24 and 48 h transfection. Most of the EGFP+ cells were also DsRed+, few EGFP-only cells appeared at 48 h. Increasing the amount of DNA apparently saturated the recombination efficiency quickly in INS-1 cells, but the percentage of EGFP+ Ad293 cells increased accordingly (Fig 3B). It is noteworthy that, even with minimum amount of DNA, below which transfection of INS-1 cells was not possible, the non-specific targeting in Ad293 cells was still substantial.

### The rat *Ins2* promoter is tightly controlled *in vitro*

One reason to explain the observation of EGFP signal in insulin-negative cells is the lack of tissue specificity of RIP used in this study. To test this hypothesis, we put the EGFP gene under the control of RIP (Fig 1C) and performed transfection experiment. EGFP signal was completely absent in Ad293 cells transfected with pRIP-EGFP, but robustly measurable in INS-1 cells (Fig 4A)

Further, we performed immunofluorescence staining to detect Cre expression in Ad293 and INS-1 cells transfected with pRIP-Cre (Fig 1B). The result showed that Cre was primarily located in the nucleus of INS-1 cells, but obviously absent in Ad293 cells (Fig 4B). Consistently, Cre transcripts identified by RT-PCR were found only in INS-1 cells, but not in Ad293 cells, after 48 h transfection (Data not shown).

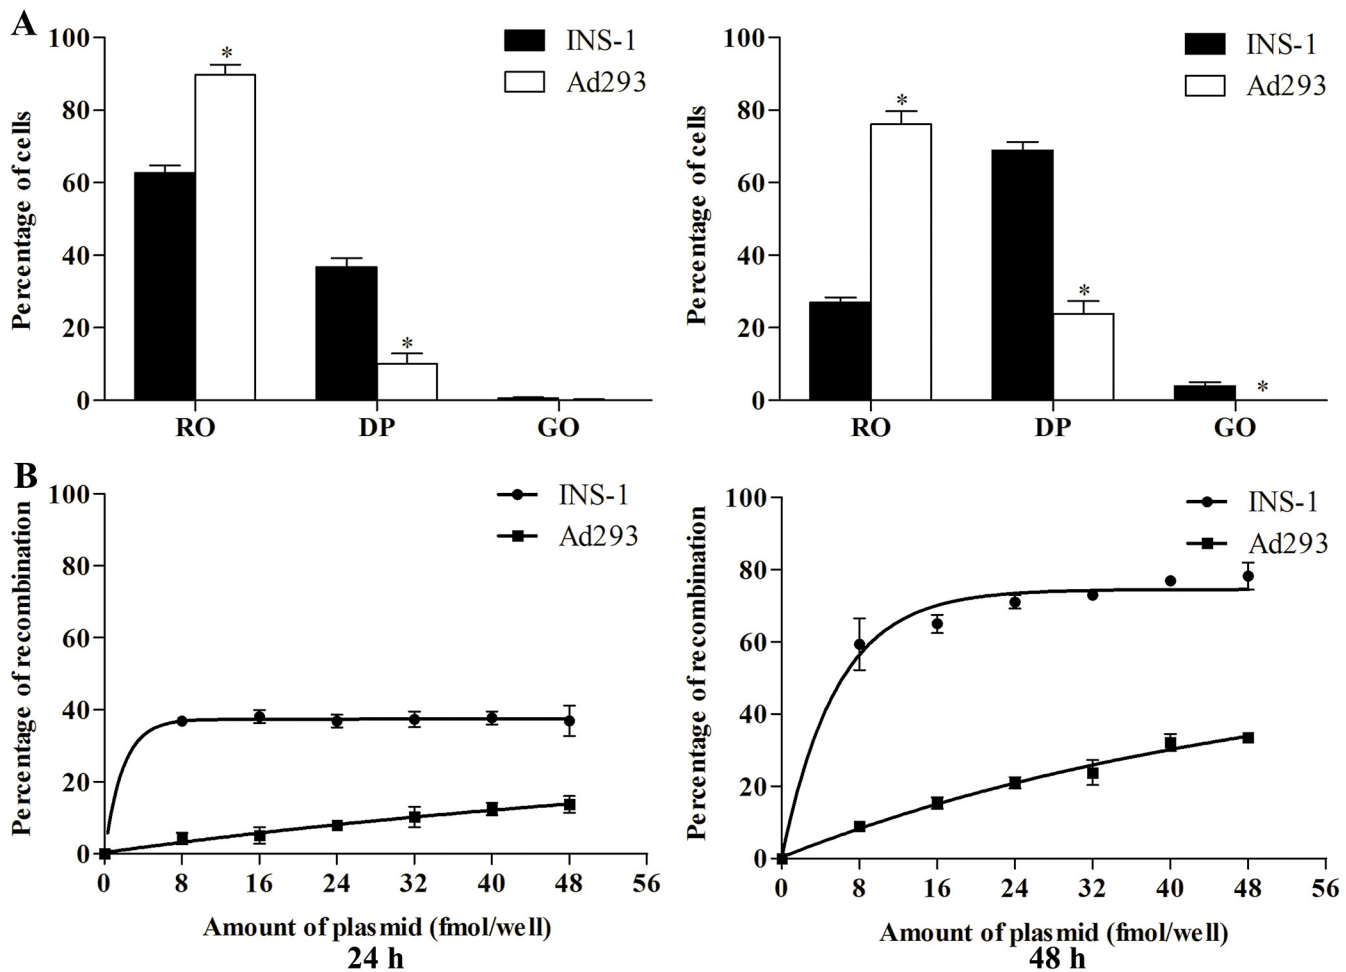

**Fig 3. Quantitative analysis of the percentage of recombination by RIP-Cre in a one-plasmid configuration.** The experiments were performed as described above with 32 fmol/well of DNA (A), or a concentration gradient of DNA (B). Cells from triplicate were pooled at 24 h (left) and 48 h (right), and analyzed by FACS. The percentage of DsRed+ only (RO), DsRed+/EGFP+ (DP), and EGFP+ only (GO) Cells (A), and the percentage of recombination (% of EGFP+) (B) were calculated using the total number of fluorescence positive cells as the denominator. N = 9. (\*p<0.05, as compared to its immediate counterpart to the left).

doi:10.1371/journal.pone.0129092.g003

### Non-specific targeting was also found with the two-plasmid system

Another possible explanation is that the CMV promoter deteriorates the tissue specificity of RIP. We therefore put EGFP and DsRed under the control of RIP and CMV, respectively, and constructed into a single vector (Fig 1D). When the plasmid was transfected into Ad293 cells, very little EGFP signal was detected (Fig 5). Increasing the amount of DNA did not affect the extent of EGFP expression in Ad293 cells (Data not shown), indicating that promoter interference was almost negligible.

To formally evaluate the effect of CMV on RIP, we generated a two-plasmid system, one for the RIP-Cre cassette, and the other for the reporter construct CMV-loxP-DsRed-loxP-EGFP (Fig 1B). Still, recombination in Ad293 cells accounted about 15% after 48 h transfection (Fig 6A), demonstrating that promoter interference was not the major factor underpinning the RIP non-specificity.



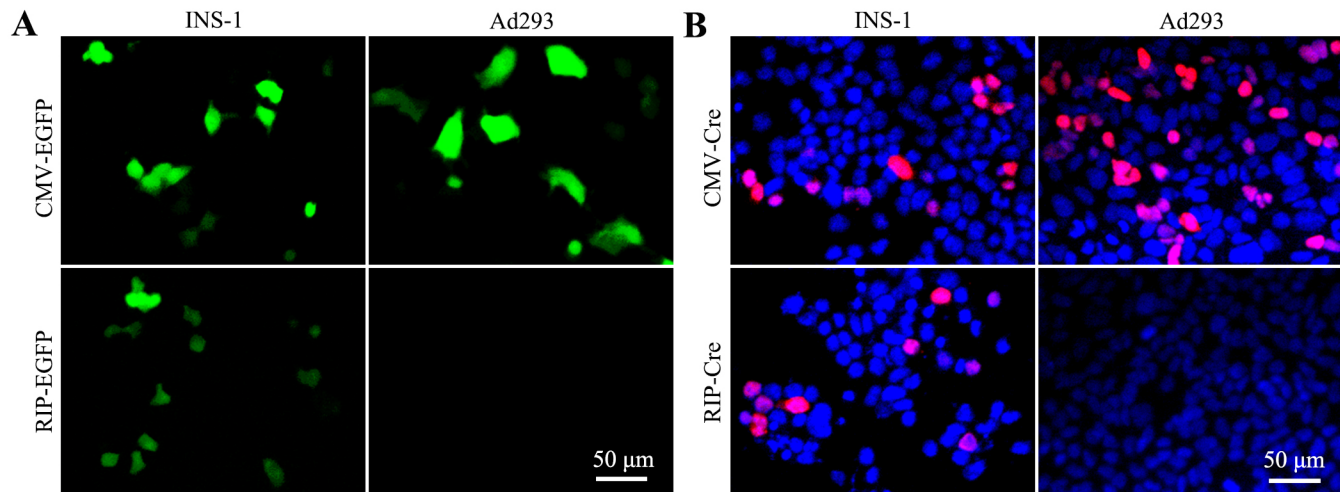

**Fig 4. Verification of the tissue specificity of RIP.** INS-1 and Ad293 cells ( $1 \times 10^4$ /well) were seeded in a 96-well plate overnight and transfected with 32 fmol/well of indicated plasmid (Fig 1C). (A) Micrographs show the expression of EGFP in INS-1 and Ad293 cells after 48 h transfection. (B) Cre protein was revealed by immunofluorescence staining.

doi:10.1371/journal.pone.0129092.g004

### Reduced expression of Cre protein levels increased labeling specificity

The above result also suggested that although Cre expression was extremely low in Ad293 cells transfected with pRIP-Cre, whereas the trace amount of enzyme still had high enough activities

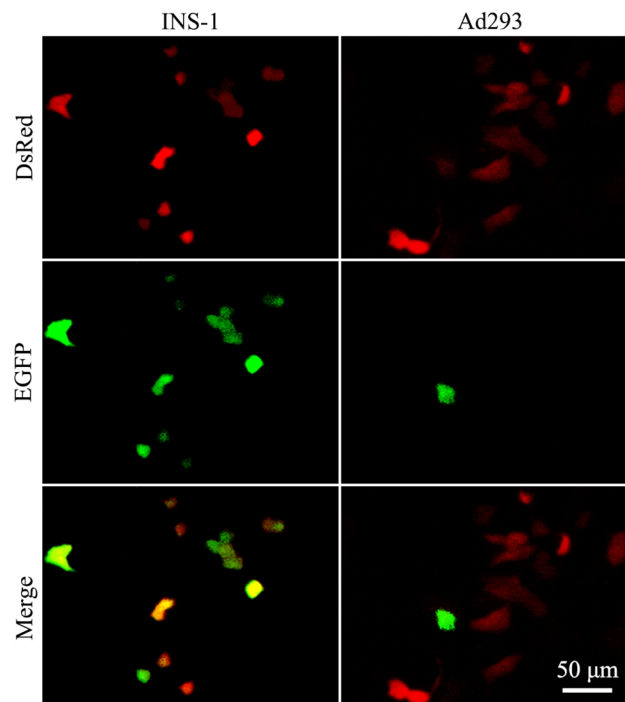

**Fig 5. Detection of promoter interference between CMV and RIP.** INS-1 and Ad293 cells ( $1 \times 10^4$ /well) were seeded in a 96-well plate overnight and transfected with 32 fmol/well of plasmid DNA for promoter interference (Fig 1D). Micrographs show the expression of DsRed (upper panel), EGFP (middle panel), and Merge (lower panel) in INS-1 and Ad293 cells after 48 h transfection.

doi:10.1371/journal.pone.0129092.g005

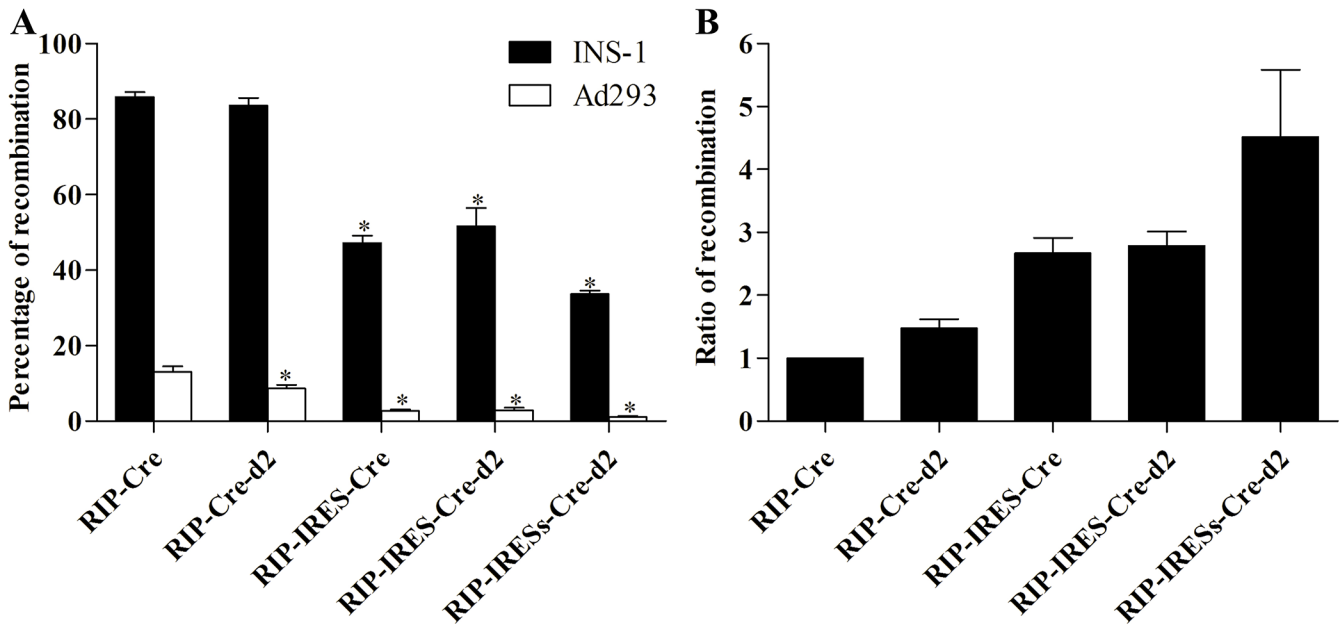

**Fig 6. Increased specific labeling of insulin-positive cells by reducing the translation level of Cre in a two-plasmid configuration.** INS-1 and Ad293 cells ( $1 \times 10^4$ /well) were seeded in a 96-well plate overnight and transfected with indicated plasmids (32 fmol of each plasmid/well) (Fig 1E). Cells from triplicate were pooled at 48 h and analyzed by FACS. The percentage of recombination (A), and the ratio of recombination (B) between INS-1 and Ad293 cells were calculated. N = 9. (\* $p < 0.05$ , as compared to that of RIP-Cre).

doi:10.1371/journal.pone.0129092.g006

to produce recombination between loxP sites. If that was the case, reducing the expression levels of Cre would probably suppress the recombination in insulin-negative cells.

To achieve this goal, we fused the murine PEST fragment of the ornithine decarboxylase (MODC, d2) to the C-terminus of Cre and thus creating a quick degrading Cre-d2 (Fig 1E). However, no effect on the recombination in Ad293 cells was observed (Fig 6A). We then introduced the internal ribosomal entry site in front of the Cre recombinase gene in frame (IRES) or out-of-frame (IRESs), and thus reduced the translation efficiency (Fig 1E). This arrangement resulted in significantly reduced recombination in Ad293 cells (Fig 6A), although very few EGFP+ cells were still identifiable. As expected, the recombination in INS-1 cells also reduced to a certain degree; however, the ratio of recombination in INS-1 v.s. Ad293 cells increased 3-4-fold (Fig 6B), revealing an increase of RIP-Cre specificity.

### Enhanced specific targeting could be achieved by using Cre mutants

An alternative approach is to reduce Cre activity without actual decrease in protein amount. Eighteen Cre variants with point-mutation were constructed. The targeted amino acids are conserved in members of the tyrosine recombinase family of site-specific recombinases and important for the catalytic activity [23].

All mutants had reduced recombination in both INS-1 and Ad293 cells (Fig 7A). However, the ratio of recombination between INS-1 v.s. Ad293 cells increased up to about 15-fold as compared to that of the wild type (Fig 6B). We chose Cre(K201R) and Cre(H289P), which showed negligible recombination activity in Ad293 cells but substantial in INS-1 cells, for further study. Wild-type Cre generated various but significant proportion of EGFP signals in insulin-negative Ad293, CHO, HeLa, Pt67, SHG44 and PC12 cells, whereas neither Cre(K201R) nor Cre(H289P) produced detectable EGFP+ cells (Fig 7C). Moreover, when both mutants

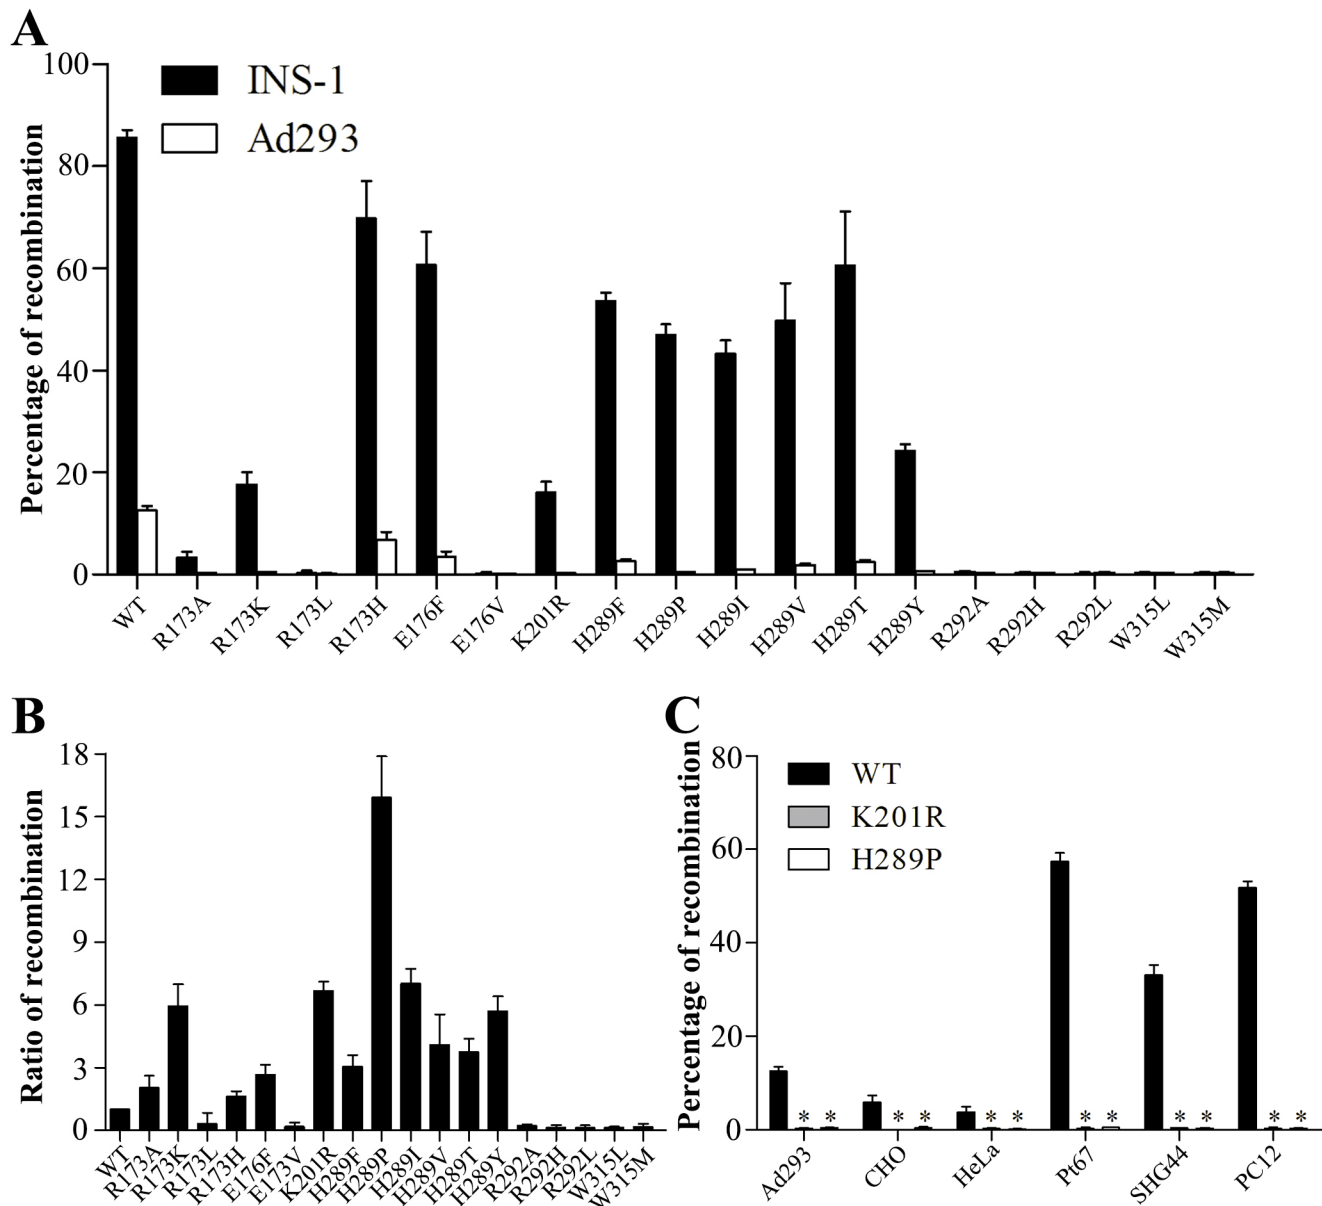

**Fig 7. Increased specific labeling of insulin-positive cells by reducing the enzymatic activity of Cre in a two-plasmid configuration.** INS-1 and Ad293 cells (A, B) and CHO, HeLa, Pt67, SHG44 cells (C) ( $1 \times 10^4$ /well) were seeded in a 96-well plate overnight and transfected with indicated plasmids (32 fmol of each plasmid/well) (Fig 1B). Cells from triplicate were pooled at 48 h and analyzed by FACS. The percentage of recombination in insulin-negative cells (A, C) and the ratio of recombination between INS-1 and Ad293 cells (B) were calculated. N = 9. (\* $p < 0.05$ , as compared to that of wild type Cre).

doi:10.1371/journal.pone.0129092.g007

were configured into a one-plasmid system, no EGFP+ cells were identified in insulin-negative cells (Data not shown).

Finally, *in vitro* DNA substrate digestion assay was carried out to measure the enzymatic activity of Cre protein. In consistent with the *in vivo* recombination capability, the activity of Cre (H289P) *in vitro* reduced to about 3% as compared to that of wild-type (Fig 8). No enzymatic activity *in vitro* was detected for Cre(K201R).

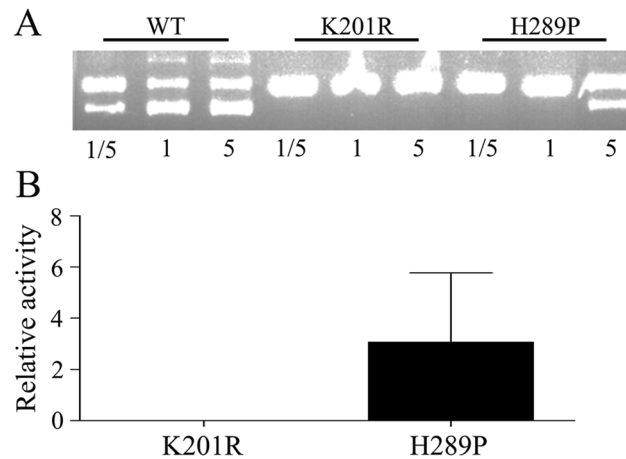

**Fig 8. Measurement of Cre activity in an *in vitro* DNA digestion assay.** (A) DNA substrate (125 ng) was incubated with various amount (1/5, 1, or 5  $\mu$ l) of IP-purified wild-type Cre (WT), or CreK201R, and CreH289P protein at 37°C for 30 min. (B) Relative activity of CreK201R and CreH289P as compared to the wild type was estimated based on the intensity of the DNA bands, which was then normalized to the amount of Cre protein determined by Western Blot analysis (Data not shown). The experiment had repeated twice.

doi:10.1371/journal.pone.0129092.g008

## Discussion

Since the first introduction of the RIP-Cre mouse line [24], where RIP represents a short (~0.6 kb) fragment of the rat *Ins2* promoter, more than a dozen similar mice have been created and used to delete genes or activate reporters in pancreatic beta-cells [1,12], revealing new processes and functions that can be imperative for finding a cure to diabetes.

The major caveat of these RIP-Cre transgenic lines lies in the noticeable ectopic expression of Cre in the brain [10–14]. Since RIP encompasses only a short segment of the intact rat *Ins2* promoter, it is conceivable that the specificity might be mitigated. However, genes knocked into the endogenous rat *Ins2* locus still showed clear expression in multiple regions of the brain [25,26]. Therefore, the data possibly reflects a resemblance in transcriptional control during development between the endocrine pancreas and the neuronal system [27–29].

In the present study, we employed a sensitive *in vitro* assay for measurement of RIP-Cre labeling specificity. Indeed, robust non-specific recombination was detected in all tested insulin-negative cells, including Ad293, CHO, HeLa, Pt67, SHG44 and PC12 (Figs 2 and 7C). The recombination was truly Cre-loxP-mediated as demonstrated by the PCR analysis on plasmid recovered after transfection (Data not shown). The non-specific recombination could not be explained by the lack of specificity of RIP, as neither Cre transcripts nor proteins were detected in Ad293 cells (Fig 4). In addition, the phenomenon of non-specific labeling could not be accounted by promoter interference [30], as only occasional EGFP signal was detected in Ad293 cells transfected with pCMV-DsRed-RIP-EGFP (Fig 5). Since a polyadenylation site was placed between DsRed and RIP, this configuration could have reduced the probability of promoter interference [31].

Further, rather than focusing on the improvement of insulin promoter specificity [32], we took on two alternative approaches to increase RIP-Cre specific labeling. One approach exploited the IRES to reduce the translation efficiency, and thus decreases the protein levels, resulting in more than 4-fold increase in ratio of recombination between INS-1 and Ad293 cells (Fig 6). On the other hand, we generated more than a dozen point mutations targeting conserved amino acids of the catalytic domain of Cre [23,33]. One of the mutants, Cre(H289P), had the most profound effect on RIP specificity, showing more than 15-fold increase in ratio of

recombination between INS-1 and Ad293 cells (Fig 7A and 7B). Also, Cre(H289P) displayed a reduction of enzymatic activity by about 30-fold as compared to that of wild-type (Fig 8), which is consistent to a previous report [33]. It should be pointed out that the EGFP signals in Ad293 cells transfected with pRIP-Cre(H289P) were not significantly above background levels. In fact, when inspected manually under fluorescence microscope, none EGFP+ Ad293 cell was identifiable from a total of more than 1000 DsRed+ cells. At the same time, the recombination efficiency in INS-1 cells maintained at about 50%, which constitutes a 35% reduction from that of wild type Cre. The results demonstrated that Cre(H289P) was superior to IRES in terms of increasing specificity while maintaining labeling efficiency of RIP-Cre (Figs 6B and 7B).

It is noteworthy that the non-specific recombination in fibroblastic Pt67, SHG44 and PC12 cells was much higher than that in epithelial cell types including Ad293, CHO, and HeLa cells (Fig 6C), implying that RIP activity varied dramatically even under suppressive environments. Taking into the consideration of the neuronal origin of SHG44 and PC12 cells, the result is in consistent with the finding that ectopic expression of Cre was predominantly found in the brain [10–14]. Nonetheless, when pRIP-Cre(H289P) was used, non-specific labeling reduced to background levels, demonstrating that decreasing the activity of Cre to a certain degree can be an effective solution to increasing RIP-Cre specificity.

On the other hand, when a long mouse *Ins1* promoter was used to produce the MIP1-GFP mice, GFP expression was found confined to the pancreatic islets only [34], reflecting that mouse *Ins1* promoter is relatively weaker than rat *Ins2* promoter [35]. However, when treated with streptozotocin, resulting in beta-cell apoptosis and thus diabetes, GFP signals were found in the liver, adipose tissue and bone marrow [16]. Therefore, finding a highly specific promoter for islet beta-cells seems intrinsically difficult, because absolutely tissue-specific cis-acting regulatory elements probably do not exist in nature. In this regard, neither the *Pdx1* nor the *Ngn3* promoter was active solely in the endocrine pancreas [1,14,36]. Nonetheless, we also cloned a 1.1 kb fragment of mouse *Ins2* promoter (MIP2), and found that pMIP2-Cre behaved similarly to pRIP-Cre (Data not shown), confirming that the lack of absolute tissue specificity was not restricted to RIP.

The inducible version of Cre (CreER), created by fusion with a modified estrogen receptor that, in the presence of tamoxifen, is able to translocate from the cytoplasm to nucleus to cleave the loxP tagged DNA. Similarly, ectopic expression of Cre activity has been reported in RIP-CreER and *Pdx1*-CreER mouse strains [14]. In addition, unintended recombination can occur in the absence of tamoxifen in older mice [37]. Although the “leakiness” can be reduced to a reasonable level by introducing mutations to the ER domain [1,38], it still raises serious concerns about the interpretations of the data. Recently, a MIP1-CreER line was created using an 8.3 kb fragment of the mouse *Ins1* gene promoter [39]. CreER mRNA expression was not detected by qRT-PCR in a panel of non-pancreatic tissues. However, its absolute specificity to the islet beta-cells needs further examination, given that extrapancreatic GFP expression was detected in diabetic MIP1-GFP mice [16]. In this regard, our preliminary data showed that un-induced recombination was completely eliminated by incorporating H289P mutation into CreER (Data not shown), demonstrating a wider application of this approach.

One last, but not the least, potential beneficial effect of Cre(H289P) could be the reduced toxicity, which has been reported in some mammalian cells expressing high levels of the wild type Cre recombinase [17,40,41], possibly due to recombination between cryptic loxP sites in the mammalian genome [19]. Genome perturbation and damage have also been postulated to compromise beta-cell function in RIP-Cre mice, leading to glucose intolerance and partial impairment in insulin secretion [17,18]. It is conceivable that off-target recombination between cryptic loxP sites will be significantly reduced by using Cre(H289P) with decreased activity.

Further, such a strategy might be also suitable to reducing off-target recombination in other genome editing systems, such as ZFNs [42,43], TALENs [44–46] and Crisper/Cas9 [47,48].

In summary, in the present study, we offered two approaches, one reduces the protein level and the other decreases the enzymatic activity, for improved specific labeling in INS-1 pancreatic beta-cells with RIP-Cre. However, the applicability of the approach needs to be tested further in *in vivo* study. Although a reasonable tradeoff in labeling efficiency is inevitable, the approach could be important to the study of islet biology and the treatment of diabetes in the future.

## Acknowledgments

We thank Tufeng Chen for technical supports in FACS analysis.

## Author Contributions

Conceived and designed the experiments: CJW YCF WCX GCG. Performed the experiments: GCG WZF DZL. Analyzed the data: CJW GCG. Contributed reagents/materials/analysis tools: XT SJC. Wrote the paper: CJW GCG.

## References

1. Magnuson MA, Osipovich AB. Pancreas-specific Cre driver lines and considerations for their prudent use. *Cell Metab.* 2013; 18: 9–20. doi: [10.1016/j.cmet.2013.06.011](https://doi.org/10.1016/j.cmet.2013.06.011) PMID: [23823474](https://pubmed.ncbi.nlm.nih.gov/23823474/)
2. Mathijs I, Houbracken I, Bouwens L. Genetic lineage tracing of beta cell neogenesis. *Methods Mol Biol.* 2012; 933: 317–322. doi: [10.1007/978-1-62703-068-7\\_21](https://doi.org/10.1007/978-1-62703-068-7_21) PMID: [22893417](https://pubmed.ncbi.nlm.nih.gov/22893417/)
3. Salpeter SJ, Dor Y. Pancreatic cells and their progenitors. *Methods Enzymol.* 2006; 419: 322–337. PMID: [17141061](https://pubmed.ncbi.nlm.nih.gov/17141061/)
4. Herrera PL. Adult insulin- and glucagon-producing cells differentiate from two independent cell lineages. *Development* 2000; 127: 2317–2322. PMID: [10804174](https://pubmed.ncbi.nlm.nih.gov/10804174/)
5. Gannon M, Herrera PL, Wright CV. Mosaic Cre-mediated recombination in pancreas using the pdx-1 enhancer/promoter. *Genesis* 2000; 26: 143–144. PMID: [10686611](https://pubmed.ncbi.nlm.nih.gov/10686611/)
6. Gu G, Dubauskaite J, Melton DA. Direct evidence for the pancreatic lineage: NGN3+ cells are islet progenitors and are distinct from duct progenitors. *Development* 2002; 129: 2447–2457. PMID: [11973276](https://pubmed.ncbi.nlm.nih.gov/11973276/)
7. Ahlgren U, Jonsson J, Jonsson L, Simu K, Edlund H. Beta cell-specific inactivation of the mouse *Ipf1/Pdx1* gene results in loss of the beta-cell phenotype and maturity onset diabetes. *Genes Dev.* 1998; 12: 1763–1768. PMID: [9637677](https://pubmed.ncbi.nlm.nih.gov/9637677/)
8. Postic C, Shiota M, Niswender KD, Jetton TL, Chen Y, Moates JM, et al. Dual roles for glucokinase in glucose homeostasis as determined by liver and pancreatic beta cell-specific gene knock-outs using Cre recombinase. *J Biol Chem.* 1999; 274: 305–315. PMID: [9867845](https://pubmed.ncbi.nlm.nih.gov/9867845/)
9. Russ HA, Bar Y, Ravassard P, Efrat S. In vitro proliferation of cells derived from adult human beta-cells revealed by cell-lineage tracing. *Diabetes* 2008; 57: 1575–1583. doi: [10.2337/db07-1283](https://doi.org/10.2337/db07-1283) PMID: [18316362](https://pubmed.ncbi.nlm.nih.gov/18316362/)
10. Lu S, Lu LY, Liu MF, Yuan QJ, Sham MH, Guan XY, et al. Cerebellar defects in *Pdss2* conditional knockout mice during embryonic development and in adulthood. *Neurobiol Dis.* 2011; 45: 219–233. doi: [10.1016/j.nbd.2011.08.006](https://doi.org/10.1016/j.nbd.2011.08.006) PMID: [21871565](https://pubmed.ncbi.nlm.nih.gov/21871565/)
11. Gustafsson E, Brakebusch C, Hietanen K, Fassler R. Tie-1-directed expression of Cre recombinase in endothelial cells of embryoid bodies and transgenic mice. *J Cell Sci.* 2001; 114: 671–676. PMID: [11171372](https://pubmed.ncbi.nlm.nih.gov/11171372/)
12. Johnson JD. A practical guide to genetic engineering of pancreatic beta-cells in vivo: Getting a grip on RIP and MIP. *Islets* 2014; 6: e944439. doi: [10.4161/19382014.2014.944439](https://doi.org/10.4161/19382014.2014.944439) PMID: [25322827](https://pubmed.ncbi.nlm.nih.gov/25322827/)
13. Song J, Xu Y, Hu X, Choi B, Tong Q. Brain expression of Cre recombinase driven by pancreas-specific promoters. *Genesis* 2010; 48: 628–634. doi: [10.1002/dvg.20672](https://doi.org/10.1002/dvg.20672) PMID: [20824628](https://pubmed.ncbi.nlm.nih.gov/20824628/)
14. Wicksteed B, Brissova M, Yan W, Opland DM, Plank JL, Reinert RB, et al. Conditional gene targeting in mouse pancreatic beta-cells: Analysis of ectopic Cre transgene expression in the brain. *Diabetes* 2010; 59: 3090–3098. doi: [10.2337/db10-0624](https://doi.org/10.2337/db10-0624) PMID: [20802254](https://pubmed.ncbi.nlm.nih.gov/20802254/)
15. Gerozissis K. Brain insulin: regulation, mechanisms of action and functions. *Cell Mol Neurobiol.* 2003; 23: 1–25. PMID: [12701882](https://pubmed.ncbi.nlm.nih.gov/12701882/)

16. Kojima H, Fujimiya M, Matsumura K, Nakahara T, Hara M, Chan L. Extrapancreatic insulin-producing cells in multiple organs in diabetes. *Proc Natl Acad Sci USA*. 2004; 101: 2458–2463. PMID: [14983031](#)
17. Pomplun D, Florian S, Schulz T, Pfeiffer AF, Ristow M. Alterations of pancreatic beta-cell mass and islet number due to Ins2-controlled expression of Cre recombinase: RIP-Cre revisited; part 2. *Horm Metab Res*. 2007; 39: 336–340. PMID: [17533574](#)
18. Lee JY, Ristow M, Lin X, White MF, Magnuson MA, Hennighausen L. RIP-Cre revisited, evidence for impairments of pancreatic beta-cell function. *J Biol Chem*. 2006; 281: 2649–2653. PMID: [16326700](#)
19. Semprini S, Troup TJ, Kotelevtseva N, King K, Davis JRE, Mullins LJ, et al. Cryptic loxP sites in mammalian genomes: genome-wide distribution and relevance for the efficiency of BAC/PAC recombinering techniques. *Nucleic Acids Res*. 2007; 35: 1402–1410. PMID: [17284462](#)
20. Dor Y, Brown J, Martinez OI, Melton DA. Adult pancreatic beta-cells are formed by self-duplication rather than stem-cell differentiation. *Nature* 2004; 429: 41–46. PMID: [15129273](#)
21. Kaczmarczyk SJ, Green JE. A single vector containing modified Cre recombinase and LOX recombination sequences for inducible tissue-specific amplification of gene expression. *Nucleic Acids Res*. 2001; 29: E56–6. PMID: [11410679](#)
22. Tang MM, Zhu QE, Fan WZ, Zhang SL, Li DZ, Liu LZ, et al. Intra-arterial targeted islet-specific expression of Sirt1 protects beta cells from streptozotocin-induced apoptosis in mice. *Mol Ther*. 2011; 19: 60–66. doi: [10.1038/mt.2010.187](#) PMID: [20842108](#)
23. Nunes-Duby S, Kwon H, Tirumalai R, Ellenberger T, Landy A. Similarities and differences among 105 members of the Int family of site-specific recombinases. *Nucleic Acids Res*. 1998; 26: 391–406. PMID: [9421491](#)
24. Kulkarni RN, Bruning JC, Winnay JN, Postic C, Magnuson MA, Kahn CR. Tissue-specific knockout of the insulin receptor in pancreatic beta cells creates an insulin secretory defect similar to that in type 2 diabetes. *Cell* 1999; 96: 329–339. PMID: [10025399](#)
25. Mehran AE, Templeman NM, Brigidi GS, Lim GE, Chu KY, Hu X, et al. Hyperinsulinemia drives diet-induced obesity independently of brain insulin production. *Cell Metab*. 2012; 16: 723–737. doi: [10.1016/j.cmet.2012.10.019](#) PMID: [23217255](#)
26. Lamotte L, Jackerott M, Bucchini D, Jami J, Joshi R.L, Deltour L. Knock-in of diptheria toxin A chain gene at Ins2 locus: effects on islet development and localization of Ins2 expression in the brain. *Transgenic Res*. 2004; 13: 463–473. PMID: [15587270](#)
27. Machida M, Fujimaki S, Hidaka R, Asashima M, Kuwabara T. The insulin regulatory network in adult hippocampus and pancreatic endocrine system. *Stem Cells Int*. 2012; 2012: 959737. doi: [10.1155/2012/959737](#) PMID: [22988465](#)
28. Hsieh J. Orchestrating transcriptional control of adult neurogenesis. *Gene Dev*. 2012; 26: 1010–1021. doi: [10.1101/gad.187336.112](#) PMID: [22588716](#)
29. Martin M, Hauer V, Messmer M, Orvain C, Gradwohl G. Transcription factors in pancreatic development. *Animal models Endocr Dev*. 2007; 12: 24–32. PMID: [17923766](#)
30. Ginn SL, Fleming J, Rowe PB, Alexander IE. Promoter interference mediated by the U3 region in early-generation HIV-1-derived lentivirus vectors can influence detection of transgene expression in a cell-type and species-specific manner. *Hum Gene Ther*. 2003; 14: 1127–1137. PMID: [12908965](#)
31. Uchida N, Hanawa H, Yamamoto M, Shimada T. The chicken hypersensitivity site 4 core insulator blocks promoter interference in lentiviral vectors. *Hum Gene Ther Methods* 2013; 24: 117–124. doi: [10.1089/hgtb.2012.152](#) PMID: [23448496](#)
32. Fukazawaa T, Matsuokaa J, Naomotoa Y, Nakaia T, Durbinb ML, Kojimac I, et al. Development of a novel beta-cell specific promoter system for the identification of insulin-producing cells in in vitro cell cultures. *Exp Cell Res*. 2006; 312: 3404–3412. PMID: [16934249](#)
33. Gibb B, Gupta K, Ghosh K, Sharp R, Chen J, Van Duyne GD. Requirements for catalysis in the Cre recombinase active site. *Nucleic Acids Res*. 2010; 17: 5817–5832. doi: [10.1093/nar/gkq384](#) PMID: [20462863](#)
34. Hara M, Wang X, Kawamura T, Bindokas VP, Dizon RF, Alcoser SY, et al. Transgenic mice with green fluorescent protein-labeled pancreatic beta-cells. *Am J Physiol Endocrinol Metab*. 2003; 284: E177–183. PMID: [12388130](#)
35. Hay CW, Docherty K. Comparative analysis of insulin gene promoters: implications for diabetes research. *Diabetes* 2006; 55: 3201–3213. PMID: [17130462](#)
36. Yoshida S, Takakura A, Ohbo K, Abe K, Wakabayashi J, Yamamoto M, et al. Neurogenin3 delineates the earliest stages of spermatogenesis in the mouse testis. *Dev Biol*. 2004; 269: 447–458. PMID: [15110712](#)

37. Liu Y, Suckale J, Masjkur J, Magro MG, Steffen A, Anastassiadis K, et al. Tamoxifen-independent recombination in the RIP-CreER mouse. *PLoS One* 2010; 5: e13533. doi: [10.1371/journal.pone.0013533](https://doi.org/10.1371/journal.pone.0013533) PMID: [21063464](https://pubmed.ncbi.nlm.nih.gov/21063464/)
38. Feil R, Wagner J, Metzger D, Chambon P. Regulation of Cre recombinase activity by mutated estrogen receptor ligand-binding domains. *Biochem Biophys Res Commun*. 1997; 237: 752–757. PMID: [9299439](https://pubmed.ncbi.nlm.nih.gov/9299439/)
39. Hasegawa Y, Daitoku Y, Mizuno S, Tanimoto Y, Mizuno-Iijima S, Matsuo M, et al. Generation and characterization of Ins1-cre-driver C57BL/6N for exclusive pancreatic beta cell-specific Cre-loxP recombination. *Exp Anim*. 2014; 63: 183–191. PMID: [24770644](https://pubmed.ncbi.nlm.nih.gov/24770644/)
40. Loonstra A, Vooijs M, Beverloo HB, Allak BA, Van Drunen E, Kanaar R, et al. Growth inhibition and DNA damage induced by Cre recombinase in mammalian cells. *Proc Natl Acad Sci USA*. 2001; 98: 9209–9214. PMID: [11481484](https://pubmed.ncbi.nlm.nih.gov/11481484/)
41. Silver DP, Livingston DM. Self-excising retroviral vectors encoding the Cre recombinase overcome Cre-mediated cellular toxicity. *Mol Cell*. 2001; 8: 233–243. PMID: [11511376](https://pubmed.ncbi.nlm.nih.gov/11511376/)
42. Pattanayak V, Ramirez CL, Joung JK, Liu DR. Revealing off-target cleavage specificities of zinc-finger nucleases by *in vitro* selection. *Nat Meth*. 2011; 8: 765–770.
43. Gabriel R, Lombardo A, Arens A, Miller JC, Genovese P, Kaepffel C, et al. An unbiased genome-wide analysis of zinc-finger nuclease specificity. *Nat Biotechnol*. 2011; 29: 816–823. doi: [10.1038/nbt.1948](https://doi.org/10.1038/nbt.1948) PMID: [21822255](https://pubmed.ncbi.nlm.nih.gov/21822255/)
44. Juillerat A, Dubois G, Valton J, Thomas S, Stella S, Marechal A, et al. Comprehensive analysis of the specificity of transcription activator-like effector nucleases. *Nucleic Acids Res*. 2014, 42, 5390–5402. doi: [10.1093/nar/gku155](https://doi.org/10.1093/nar/gku155) PMID: [24569350](https://pubmed.ncbi.nlm.nih.gov/24569350/)
45. Guilinger JP, Pattanayak V, Reyon D, Tsai SQ, Sander JD, Joung JK, et al. Broad specificity profiling of TALENs results in engineered nucleases with improved DNA-cleavage specificity. *Nat Methods* 2014; 11: 429–435. doi: [10.1038/nmeth.2845](https://doi.org/10.1038/nmeth.2845) PMID: [24531420](https://pubmed.ncbi.nlm.nih.gov/24531420/)
46. Lei Y, Guo X, Liu Y, Cao Y, Deng Y, Chen X, et al. Efficient targeted gene disruption in *Xenopus* embryos using engineered transcription activator-like effector nucleases (TALENs). *Proc Natl Acad Sci USA*. 2012; 109: 17484–17489. doi: [10.1073/pnas.1215421109](https://doi.org/10.1073/pnas.1215421109) PMID: [23045671](https://pubmed.ncbi.nlm.nih.gov/23045671/)
47. Fu Y, Foden JA, Khayter C, Maeder ML, Reyon D, Joung JK, et al. High-frequency off-target mutagenesis induced by CRISPR-Cas nucleases in human cells. *Nat Biotechnol*. 2013; 31: 822–826. doi: [10.1038/nbt.2623](https://doi.org/10.1038/nbt.2623) PMID: [23792628](https://pubmed.ncbi.nlm.nih.gov/23792628/)
48. Cradick TJ, Fine EJ, Antico CJ, Bao G. CRISPR/Cas9 systems targeting  $\beta$ -globin and CCR5 genes have substantial off-target activity. *Nucleic Acids Res*. 2013; 41: 9584–9592. doi: [10.1093/nar/gkt714](https://doi.org/10.1093/nar/gkt714) PMID: [23939622](https://pubmed.ncbi.nlm.nih.gov/23939622/)
